# Supplementary material
Source: HighWire-hosted journal article supplement (https://bibliotheek.ehb.be/content/105/2/117)
Supplement: inline-supplementary-material-1 [file inline-supplementary-material-1.pdf]

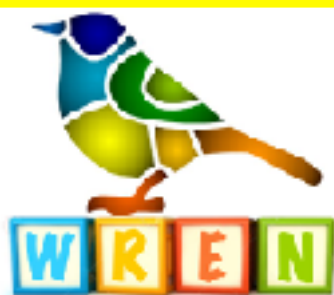

**Welsh Research and Education Network**  
**Spring Study Day: Friday 11th May 2018**  
**Multi-Professional Education Centre,**  
**Princess of Wales Hospital, Bridgend**  
wrenpaediatrics@hotmail.com www.wrenpaediatrics.com  
@WRENpaeds

**Programme**  
**0930**

**The Children and Young Adults Research Unit (CYARU) at  
Children's Hospital for Wales - An Introduction**

*Dr Phil Connor, Consultant Paediatric Haematologist, CYARU Lead Clinician*  
*Rhian Thomas-Turner, Operations Manager, CYARU*

**1030**

**Rapid-Fire Critical Appraisal for START Assessments**

*Dr Ian Morris, Consultant Neonatologist, University Hospital of Wales*

**1130**

**Coffee Break**

**1200**

**An Introduction to Quality Improvement - Workshop Session**

*Quality Improvement Skills Training (QIST) Team, Postgraduate Medical Education Wales*

**1300**

**Lunch**

**1400**

**Update on WREN Projects**

***All-Wales Investigation into Antibiotic Use on Postnatal Wards***

*Zoe Howard, Annabel Greenwood, Chris Course*

***All-Wales Re-audit into the Management of RDS - An Update***

*Chris Course*

***Use of Septic Screens in Febrile Infants <3 Months Old***

*Blanche Lumb*

**1500**

**Invitation for Proposal of New Projects**

***The Impact of Meningococcal B Vaccination on Septic Screens***

*Rebecca Towler, Ele Jones*

***Improving ECG Interpretation Skills***

*Ankita Jain*

***Using a Paediatric Resus App - Implications on Clinical Practice***

*Jordan Evans*

**1600**

**Close**
